# Supplementary material for: Adsorption and reaction properties of SnBEA, ZrBEA and H-BEA for the formation of p-xylene from DMF and ethylene
Source: Royal Society of Chemistry journal article supplement (doi:10.1039/c6cy00501b), 2016-01-01
Supplement: c6cy00501b1.pdf [file c6cy00501b1.pdf]

|    | Catalyst loading (g) | Total mol flow rate (*10 <sup>-3</sup> mol/min) | Heptane mol concentration | C <sub>2</sub> H <sub>4</sub> mol concentration | DMF mol concentration | Pressure (bar) | Conversion | Selectivity | Turn Over Frequency (h <sup>-1</sup> ) |
|----|----------------------|-------------------------------------------------|---------------------------|-------------------------------------------------|-----------------------|----------------|------------|-------------|----------------------------------------|
| 1  | 0.1                  | 2.3                                             | 29%                       | 70%                                             | 1%                    | 55             | 3.9%       | 95%         | 3.3                                    |
| 2  | 0.1                  | 1.7                                             | 39%                       | 60%                                             | 1%                    | 55             | 6.9%       | 93%         | 5.7                                    |
| 3  | 0.1                  | 1.1                                             | 61%                       | 37%                                             | 2%                    | 55             | 7.9%       | 92%         | 6.5                                    |
| 4  | 0.1                  | 1.4                                             | 24%                       | 75%                                             | 1%                    | 55             | 8.5%       | 92%         | 3.9                                    |
| 5  | 0.1                  | 1.7                                             | 39%                       | 60%                                             | 1%                    | 55             | 6.9%       | 93%         | 5.7                                    |
| 6  | 0.1                  | 2.4                                             | 55%                       | 43%                                             | 2%                    | 55             | 3.7%       | 94%         | 6.1                                    |
| 7  | 0.1                  | 1.7                                             | 39%                       | 60%                                             | 1%                    | 69             | 9.0%       | 87%         | 7.0                                    |
| 8  | 0.1                  | 1.7                                             | 39%                       | 60%                                             | 1%                    | 55             | 6.9%       | 93%         | 5.7                                    |
| 9  | 0.1                  | 1.7                                             | 39%                       | 60%                                             | 1%                    | 41             | 4.9%       | 94%         | 4.1                                    |
| 10 | 0.1                  | 1.7                                             | 39%                       | 60%                                             | 1%                    | 28             | 2.8%       | 97%         | 2.4                                    |
| 11 | 0.1                  | 1.7                                             | 39%                       | 60%                                             | 1%                    | 10             | 1.2%       | 99.5%       | 3.1                                    |
| 12 | 0.1                  | 1.7                                             | 39%                       | 60%                                             | 1%                    | 55             | 6.9%       | 93%         | 5.7                                    |
| 13 | 0.1                  | 1.7                                             | 37%                       | 60%                                             | 3%                    | 55             | 6.1%       | 85%         | 11.6                                   |
| 14 | 0.1                  | 1.7                                             | 35%                       | 59%                                             | 6%                    | 55             | 5.7%       | 74%         | 18.8                                   |
| 15 | 0.05                 | 1.7                                             | 39%                       | 60%                                             | 1%                    | 55             | 14%        | 85%         | 5.9                                    |
| 16 | 0.1                  | 1.7                                             | 39%                       | 60%                                             | 1%                    | 55             | 6.9%       | 93%         | 5.7                                    |
| 17 | 0.2                  | 1.7                                             | 39%                       | 60%                                             | 1%                    | 55             | 3.4%       | 98.5%       | 5.3                                    |

Table S1 Reaction results on Sn-BEA at 650 K with different partial pressure of C<sub>2</sub>H<sub>4</sub> and 2,5-dimethylfuran

| Catalyst | Total mol flow rate (*10 <sup>-3</sup> mol/min) | Heptane mol concentration | C <sub>2</sub> H <sub>4</sub> mol concentration | DMF mol concentration | Temperature (°C) | Conversion | Selectivity | Reaction rate (1/(site.h)) |
|----------|-------------------------------------------------|---------------------------|-------------------------------------------------|-----------------------|------------------|------------|-------------|----------------------------|
| H-BEA    | 1.7                                             | 38.9%                     | 59.9%                                           | 1.2%                  | 350              | 11.4%      | 48%         | 1.3                        |
| H-BEA    | 1.7                                             | 37.4%                     | 59.6%                                           | 3.0%                  | 350              | 11.8%      | 45%         | 3.3                        |
| H-BEA    | 1.7                                             | 34.9%                     | 59.1%                                           | 6.0%                  | 350              | 12.5%      | 43.5%       | 6.8                        |
| Zr-BEA   | 1.7                                             | 38.9%                     | 59.9%                                           | 1.2%                  | 375              | 5.8%       | 88%         | 9.7                        |
| Zr-BEA   | 1.7                                             | 37.4%                     | 59.6%                                           | 3.0%                  | 375              | 5.5%       | 87%         | 17.2                       |
| Zr-BEA   | 1.7                                             | 34.9%                     | 59.1%                                           | 6.0%                  | 375              | 5.2%       | 86.5%       | 19.7                       |
| Zr-BEA   | 1.7                                             | 38.9%                     | 59.9%                                           | 1.2%                  | 425              | 12.8%      | 87%         | 13.9                       |
| Zr-BEA   | 1.7                                             | 37.4%                     | 59.6%                                           | 3.0%                  | 425              | 12.4%      | 85%         | 33.2                       |
| Zr-BEA   | 1.7                                             | 34.9%                     | 59.1%                                           | 6.0%                  | 425              | 12.8%      | 81%         | 65.0                       |

Table S2 Reaction rates for 0.1g H-BEA and Zr-BEA under 55 bar at different temperature with different partial pressure of C<sub>2</sub>H<sub>4</sub> and 2,5-dimethylfuran

| Catalyst | Temperature(°C) | Conversion | Selectivity | Reaction rate<br>(1/(site.h)) | $\log(k)$<br>$(k = \frac{r}{c(C_2H_4)c(DMF)})$ |
|----------|-----------------|------------|-------------|-------------------------------|------------------------------------------------|
| H-BEA    | 325             | 8.4%       | 42%         | 0.9                           | 4.6                                            |
| H-BEA    | 350             | 11.4%      | 48%         | 1.4                           | 5.1                                            |
| H-BEA    | 375             | 16.3%      | 51%         | 2.1                           | 5.6                                            |
| H-BEA    | 400             | 18.7%      | 57%         | 2.7                           | 5.9                                            |
| H-BEA    | 425             | 25.8%      | 49%         | 3.1                           | 6.2                                            |
| Sn-BEA   | 350             | 3.7%       | 93%         | 3.03                          | 6.9                                            |
| Sn-BEA   | 375             | 6.9%       | 92%         | 5.7                           | 7.6                                            |
| Sn-BEA   | 400             | 11.6%      | 86%         | 8.9                           | 8.2                                            |
| Sn-BEA   | 425             | 13.6%      | 85%         | 10.3                          | 8.4                                            |
| Sn-BEA   | 450             | 18.2%      | 85%         | 13.8                          | 8.7                                            |
| Zr-BEA   | 350             | 4.1%       | 87%         | 4.5                           | 6.3                                            |
| Zr-BEA   | 375             | 5.9%       | 88%         | 6.4                           | 6.7                                            |
| Zr-BEA   | 400             | 7.6%       | 88%         | 8.3                           | 7.1                                            |
| Zr-BEA   | 425             | 12.8%      | 87%         | 13.9                          | 7.6                                            |
| Zr-BEA   | 450             | 19.8%      | 86%         | 21.4                          | 8.1                                            |

Table S3 Reaction results for different temperature at 55 bar, gas flow rate 25ml/min, liquid flow rate 0.1ml/min, 0.1g catalysts (H-BEA, Sn-BEA, Zr-BEA), 2% 2,5-dimethylfuran concentration in heptane
